# Supplementary material
Source: PubMed Central journal article supplement (PMC4445974)

**PERIPHERAL ADIPOSE TISSUE INSULIN RESISTANCE ALTERS LIPID  
COMPOSITION AND FUNCTION OF HIPPOCAMPAL SYNAPSES**

Hanaa S. Sallam<sup>1</sup>, Batbayar Tumurbaatar<sup>1</sup>, Wen-Ru Zhang<sup>2</sup>, Demidmaa Tuvdendorj<sup>1</sup>, Manisha Chandalia<sup>1,4</sup>, Filippo Tempia<sup>3</sup>, Fernanda Laezza<sup>3</sup>, Giulio Tagliatela<sup>2</sup>, Nicola Abate<sup>1,4</sup>

<sup>1</sup>Department of Internal Medicine, Division of Endocrinology; <sup>2</sup>Mitchell Center for Neurodegenerative Diseases, Department of Neurology; <sup>3</sup>Department of Pharmacology & Toxicology, University of Texas Medical Branch, Galveston and <sup>4</sup>Department of Internal Medicine, Division of Endocrinology, UT Southwestern, TX, USA

*Running title: Peripheral IR alters hippocampal synapses*

***Corresponding authors:***

Nicola Abate, MD

Phone: 409 772 6314

Fax: 409 772 8709

Email: [niabate@utmb.edu](mailto:niabate@utmb.edu)

Giulio Tagliatela, PhD

Phone: 409-772-1679

Fax: 409-772-3222

Email: [gtaglial@utmb.edu](mailto:gtaglial@utmb.edu)

## FIGURE LEGENDS

**Figure 1S. Regional brain response to insulin.** Insulin was injected in the peritoneum 30 minutes before harvesting the brain. *AtENPPI*-Tg RC showed blunted post-receptor response to systemic insulin elevation compared to their WT littermates. HIPP: Hippocampus – FCTX: Frontal Cortex – MDB: Mid-Brain – PCTX: Parietal Cortex – Sal: saline – Ins: Insulin.

**Figure 1S**

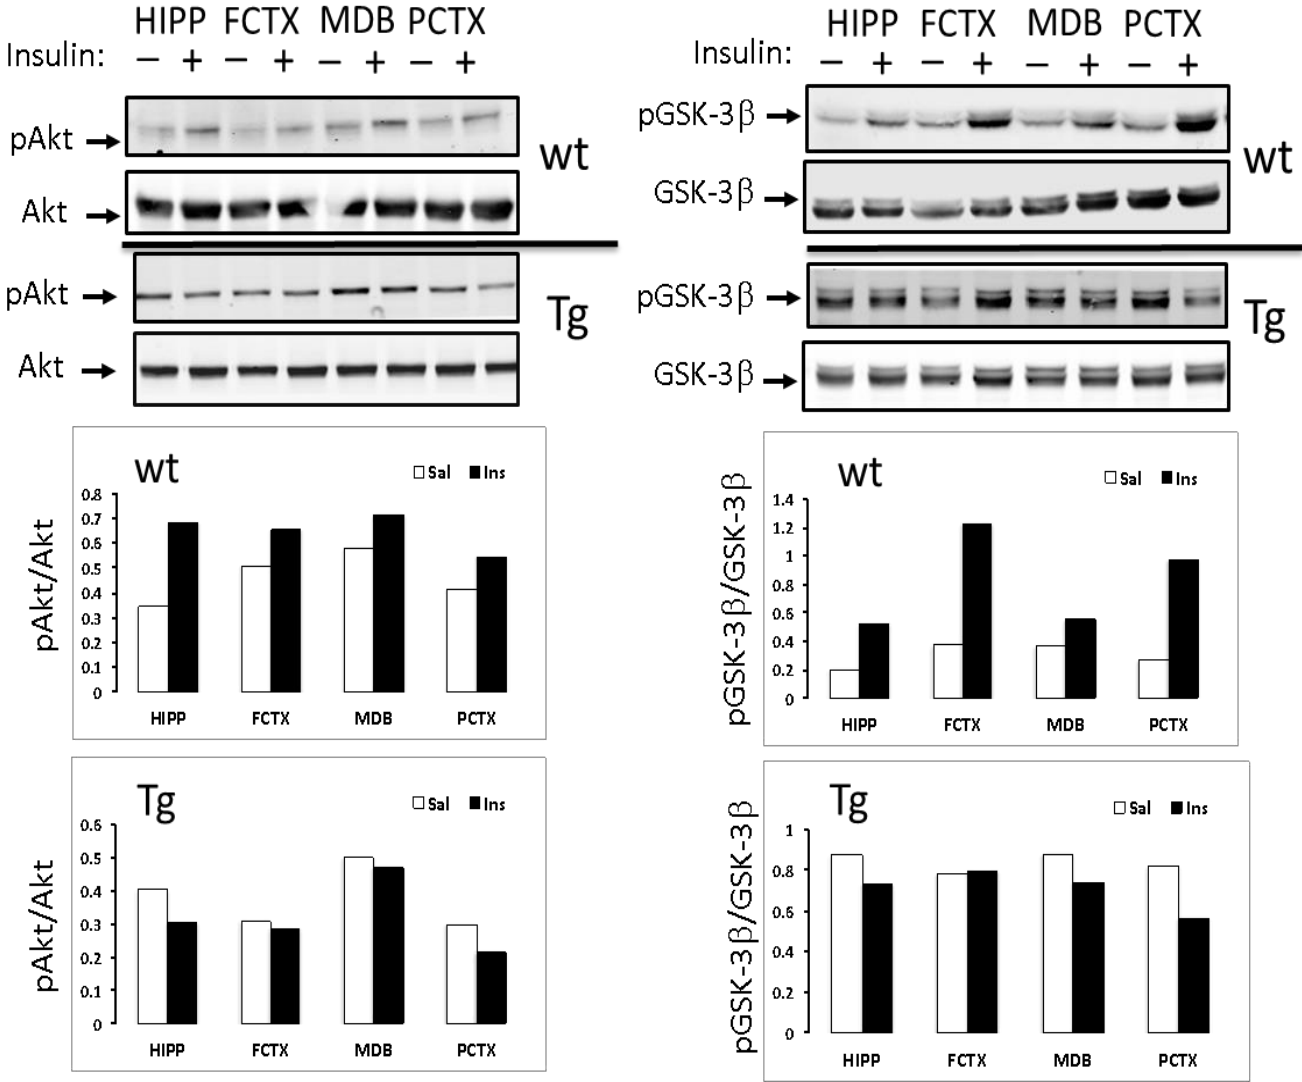

Supplement: NIHMS665074-supplement-Supp_FigureS1.pdf [file NIHMS665074-supplement-Supp_FigureS1.pdf]
